# Supplementary material for: Organic Fertilization and Sufficient Nutrient Status in Prehistoric Agriculture? – Indications from Multi-Proxy Analyses of Archaeological Topsoil Relicts
Source: PubMed Central journal article supplement (PMC4152168; doi:10.1371/journal.pone.0106244), 2014-09-02
Supplement: pone.0106244.s003.pdf [file pone.0106244.s003.pdf]

**Table S1: Contents of *aqua regia* extractable elements (in mg kg<sup>-1</sup>) of all pit filling soil samples.**

| Id | Site                | Sample type      | Ca                     | Co | Cu | Fe    | I   | Mg    | Mn   | Mo | Ni | P    | S    | Se | Sr | Ti  | Zn   | Zr |
|----|---------------------|------------------|------------------------|----|----|-------|-----|-------|------|----|----|------|------|----|----|-----|------|----|
|    |                     |                  | [mg kg <sup>-1</sup> ] |    |    |       |     |       |      |    |    |      |      |    |    |     |      |    |
| 1  | Klein Gräfendorf    | pit filling      | 14819                  | 6  | 5  | 18762 | 0   | 7392  | 410  | 0  | 15 | 348  | 788  | 0  | 52 | 421 | 37   | 10 |
| 2  | Klein Gräfendorf    | adjacent subsoil | 14878                  | 5  | 3  | 12925 | 0   | 7701  | 246  | 0  | 12 | 337  | 333  | 0  | 38 | 414 | 21   | 9  |
| 3  | Klein Gräfendorf    | recent topsoil   | 9796                   | 7  | 16 | 21306 | 216 | 3974  | 490  | 1  | 18 | 683  | 361  | 9  | 34 | 445 | 44   | 8  |
| 4  | Klein Gräfendorf    | pit filling      | 57077                  | 6  | 13 | 18568 | 151 | 8723  | 388  | 2  | 15 | 428  | 3189 | 8  | 53 | 424 | 25   | 12 |
| 5  | Klein Gräfendorf    | adjacent subsoil | 81830                  | 6  | 9  | 16973 | 150 | 11840 | 318  | 2  | 15 | 416  | 1435 | 7  | 59 | 408 | 19   | 17 |
| 6  | Jügendorf           | adjacent subsoil | 67953                  | 6  | 4  | 17075 | 52  | 10809 | 337  | 0  | 15 | 385  | 95   | 0  | 56 | 441 | 31   | 8  |
| 7  | Jügendorf           | pit filling      | 17676                  | 7  | 4  | 19431 | 64  | 5602  | 464  | 0  | 17 | 378  | 675  | 0  | 24 | 429 | 40   | 6  |
| 8  | Jügendorf           | recent topsoil   | 13244                  | 7  | 7  | 23121 | 0   | 4736  | 441  | 0  | 18 | 463  | 240  | 0  | 31 | 585 | 50   | 19 |
| 9  | Jügendorf           | pit filling      | 41488                  | 7  | 26 | 19252 | 156 | 7255  | 375  | 2  | 17 | 402  | 796  | 9  | 29 | 442 | 30   | 18 |
| 10 | Jügendorf           | adjacent subsoil | 22905                  | 7  | 15 | 21973 | 83  | 6392  | 492  | 0  | 17 | 371  | 1160 | 0  | 26 | 598 | 49   | 12 |
| 11 | Jügendorf           | recent topsoil   | 4974                   | 8  | 19 | 23380 | 69  | 3924  | 511  | 0  | 20 | 389  | 567  | 0  | 27 | 573 | 56   | 11 |
| 12 | Jügendorf           | pit filling      | 12746                  | 8  | 17 | 21709 | 69  | 5002  | 519  | 0  | 19 | 282  | 1083 | 0  | 18 | 578 | 47   | 8  |
| 13 | Jügendorf           | adjacent subsoil | 59553                  | 7  | 14 | 19096 | 60  | 11372 | 363  | 0  | 15 | 401  | 737  | 0  | 53 | 548 | 36   | 10 |
| 14 | Jügendorf           | recent topsoil   | 5126                   | 8  | 25 | 21259 | 61  | 3382  | 584  | 1  | 18 | 417  | 702  | 0  | 29 | 473 | 67   | 8  |
| 15 | Oechlitz            | settlement pit   | 14709                  | 6  | 7  | 16946 | 0   | 5896  | 416  | 0  | 15 | 2365 | 190  | 0  | 80 | 366 | 39   | 3  |
| 16 | Oechlitz            | pit filling      | 37994                  | 6  | 12 | 17986 | 667 | 7950  | 421  | 2  | 16 | 873  | 1001 | 8  | 56 | 421 | 37   | 23 |
| 17 | Oechlitz            | adjacent subsoil | 48628                  | 7  | 9  | 18489 | 398 | 12025 | 316  | 2  | 15 | 843  | 754  | 8  | 60 | 473 | 27   | 52 |
| 18 | Oechlitz            | recent topsoil   | 11131                  | 7  | 15 | 20077 | 645 | 4423  | 476  | 3  | 19 | 1339 | 179  | 10 | 35 | 466 | 42   | 31 |
| 19 | Prießnitz           | recent topsoil   | 3062                   | 9  | 13 | 25641 | 270 | 4724  | 652  | 1  | 16 | 587  | 224  | 10 | 18 | 621 | 43   | 3  |
| 20 | Prießnitz           | pit filling      | 3895                   | 9  | 13 | 27630 | 320 | 5935  | 1207 | 1  | 31 | 674  | 16   | 10 | 11 | 475 | 7299 | 16 |
| 21 | Prießnitz           | adjacent subsoil | 31639                  | 10 | 13 | 27463 | 190 | 10772 | 1972 | 2  | 27 | 427  | 80   | 11 | 31 | 450 | 47   | 11 |
| 22 | Prießnitz           | pit filling      | 5163                   | 9  | 13 | 25143 | 138 | 6569  | 511  | 1  | 22 | 513  | 35   | 11 | 19 | 598 | 54   | 10 |
| 23 | Prießnitz           | adjacent subsoil | 36970                  | 9  | 16 | 25268 | 76  | 7257  | 468  | 1  | 22 | 322  | 43   | 9  | 34 | 366 | 35   | 11 |
| 24 | Merzenich           | recent topsoil   | 5930                   | 8  | 15 | 23397 | 12  | 3857  | 652  | 3  | 21 | 1225 | 243  | 7  | 11 | 337 | 66   | 2  |
| 25 | Merzenich           | adjacent subsoil | 54463                  | 9  | 12 | 22880 | 224 | 7513  | 511  | 3  | 23 | 701  | 65   | 9  | 56 | 454 | 39   | 10 |
| 26 | Merzenich           | pit filling      | 4398                   | 11 | 18 | 38374 | 424 | 4840  | 677  | 2  | 29 | 938  | 58   | 11 | 14 | 442 | 62   | 8  |
| 27 | Merzenich           | pit filling      | 3709                   | 11 | 15 | 32349 | 372 | 4737  | 624  | 1  | 28 | 833  | 35   | 10 | 12 | 408 | 52   | 7  |
| 28 | Merzenich           | pit filling      | 4107                   | 10 | 16 | 32326 | 348 | 4187  | 572  | 2  | 26 | 778  | 39   | 10 | 13 | 479 | 54   | 12 |
| 29 | Merzenich           | pit filling      | 4911                   | 13 | 19 | 25494 | 519 | 4958  | 925  | 1  | 27 | 950  | 80   | 17 | 13 | 434 | 108  | 21 |
| 30 | Merzenich           | pit filling      | 3908                   | 13 | 14 | 25031 | 282 | 3756  | 841  | 2  | 25 | 733  | 86   | 16 | 11 | 400 | 90   | 16 |
| 31 | Merzenich           | adjacent subsoil | 25853                  | 11 | 15 | 30412 | 6   | 3495  | 783  | 3  | 28 | 523  | 40   | 8  | 35 | 265 | 41   | 13 |
| 32 | Merzenich           | adjacent subsoil | 2186                   | 13 | 16 | 30632 | 4   | 2160  | 811  | 3  | 30 | 550  | 25   | 8  | 10 | 233 | 48   | 13 |
| 33 | Merzenich           | adjacent subsoil | 2175                   | 13 | 17 | 34812 | 7   | 2175  | 906  | 3  | 32 | 604  | 24   | 9  | 10 | 249 | 49   | 14 |
| 34 | Merzenich           | adjacent subsoil | 3545                   | 9  | 14 | 30942 | 18  | 3502  | 568  | 3  | 22 | 787  | 24   | 10 | 13 | 451 | 46   | 7  |
| 35 | Merzenich           | adjacent subsoil | 4674                   | 5  | 13 | 30729 | 21  | 5243  | 422  | 4  | 24 | 874  | 48   | 11 | 12 | 699 | 49   | 9  |
| 36 | Merzenich           | pit filling      | 3345                   | 13 | 18 | 23914 | 423 | 3715  | 1017 | 1  | 23 | 661  | 61   | 14 | 13 | 514 | 61   | 14 |
| 37 | Merzenich           | pit filling      | 3168                   | 15 | 21 | 26766 | 318 | 4281  | 952  | 2  | 29 | 727  | 87   | 18 | 15 | 40  | 75   | 14 |
| 38 | Merzenich           | adjacent subsoil | 2398                   | 18 | 26 | 29901 | 292 | 3721  | 1559 | 2  | 32 | 593  | 56   | 15 | 12 | 285 | 73   | 16 |
| 39 | Merzenich           | pit filling      | 4705                   | 9  | 19 | 31488 | 12  | 4576  | 602  | 3  | 25 | 978  | 40   | 10 | 13 | 453 | 54   | 6  |
| 40 | Merzenich           | adjacent subsoil | 5135                   | 10 | 17 | 35850 | 15  | 6204  | 586  | 4  | 30 | 1269 | 43   | 10 | 12 | 500 | 50   | 7  |
| 41 | Merzenich           | pit filling      | 1034                   | 9  | 14 | 48377 | 2   | 2508  | 672  | 2  | 20 | 552  | 21   | 5  | 6  | 86  | 28   | 4  |
| 42 | Merzenich           | adjacent subsoil | 21537                  | 18 | 23 | 40573 | 170 | 5334  | 1741 | 2  | 37 | 559  | 52   | 9  | 26 | 184 | 47   | 16 |
| 43 | Merzenich           | pit filling      | 5410                   | 12 | 18 | 31154 | 404 | 5198  | 806  | 2  | 33 | 883  | 52   | 11 | 15 | 439 | 38   | 6  |
| 44 | Merzenich           | adjacent subsoil | 50378                  | 9  | 15 | 28181 | 10  | 8310  | 627  | 3  | 23 | 507  | 72   | 7  | 48 | 236 | 40   | 11 |
| 45 | Pulheim             | recent topsoil   | 2426                   | 7  | 11 | 18430 | 207 | 2484  | 627  | 2  | 18 | 800  | 137  | 7  | 10 | 375 | 52   | 1  |
| 46 | Pulheim             | adjacent subsoil | 3329                   | 10 | 24 | 29483 | 0   | 4305  | 524  | 0  | 29 | 725  | 48   | 0  | 13 | 452 | 80   | 6  |
| 47 | Pulheim             | pit filling      | 3200                   | 9  | 14 | 28203 | 236 | 4387  | 427  | 3  | 26 | 817  | 29   | 11 | 9  | 465 | 43   | 8  |
| 48 | Pulheim             | adjacent subsoil | 2527                   | 9  | 12 | 24576 | 194 | 3993  | 508  | 3  | 25 | 740  | 42   | 10 | 10 | 422 | 40   | 5  |
| 49 | Pulheim             | pit filling      | 4080                   | 10 | 27 | 32206 | 0   | 4784  | 583  | 0  | 31 | 856  | 67   | 0  | 15 | 452 | 61   | 6  |
| 50 | Düren Arnoldsweiler | below humic zone | 1463                   | 6  | 7  | 15526 | 86  | 2032  | 353  | 1  | 19 | 203  | 72   | 7  | 8  | 434 | 32   | 17 |
| 51 | Düren Arnoldsweiler | humic zone       | 2070                   | 9  | 13 | 19484 | 109 | 2399  | 767  | 1  | 30 | 257  | 62   | 10 | 10 | 430 | 39   | 15 |
