# Supplementary material for: Organic Fertilization and Sufficient Nutrient Status in Prehistoric Agriculture? – Indications from Multi-Proxy Analyses of Archaeological Topsoil Relicts
Source: PubMed Central journal article supplement (PMC4152168; doi:10.1371/journal.pone.0106244), 2014-09-02
Supplement: pone.0106244.s004.pdf [file pone.0106244.s004.pdf]

**Table S2: Molecular structures, the retention times, and the selected characteristic ion fragments of the relevant steroids.**

| Biomarker group       | Substance                                                          | Trivial name, molecular formular                                                                      | Structure                                                                            | Retention time (min) <sup>a</sup> | Characteristic ion fragments (m/z) <sup>a</sup> |
|-----------------------|--------------------------------------------------------------------|-------------------------------------------------------------------------------------------------------|--------------------------------------------------------------------------------------|-----------------------------------|-------------------------------------------------|
| <b><u>Sterols</u></b> | Cholest-5-en-3 $\beta$ -ol                                         | Cholesterol<br>C <sub>27</sub> H <sub>46</sub> O                                                      | 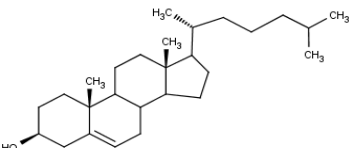   | 36.3                              | 329; 368; 458                                   |
|                       | Stigmast-5-en-3 $\beta$ -ol,<br>24-Ethyl-5-cholesten-3 $\beta$ -ol | $\beta$ -Sitosterol<br>C <sub>29</sub> H <sub>50</sub> O                                              |    | 41.4                              | 357; 396; 486                                   |
|                       | Stigmasta-5,22-dien-3 $\beta$ -ol                                  | Stigmasterol<br>C <sub>29</sub> H <sub>48</sub> O                                                     |    | 43.6                              | 255; 394; 484                                   |
|                       | 5 $\beta$ -pregnan-3 $\alpha$ -ol                                  | Desoxypregnanolone <sup>b</sup><br>C <sub>21</sub> H <sub>35</sub> O                                  |    | 21.2                              | 215; 286; 361                                   |
| <b><u>Stanols</u></b> | 5 $\beta$ -cholestan-3 $\beta$ -ol                                 | <b>Coprostanol</b><br>C <sub>27</sub> H <sub>48</sub> O                                               |   | 33.3                              | 215; 257; 370                                   |
|                       | 5 $\beta$ -cholestan-3 $\alpha$ -ol                                | <b>Epicoprostanol</b><br>C <sub>27</sub> H <sub>48</sub> O                                            |  | 33.5                              | 215; 355; 370                                   |
|                       | 5 $\alpha$ -Cholestanol                                            | <b><math>\alpha</math>-Cholestanol</b><br>(Dihydrocholesterol)<br>C <sub>27</sub> H <sub>48</sub> O   |  | 36.7                              | 217; 445; 460                                   |
|                       | 24-ethyl-5 $\beta$ -cholestan-3 $\beta$ -ol                        | <b><math>\beta</math>-Stigmastanol</b><br>(24-Ethyl-Coprostanol)<br>C <sub>29</sub> H <sub>52</sub> O |  | 40.5                              | 215; 383; 398                                   |
|                       | 24 $\beta$ -ethyl-5 $\beta$ -cholestan-3 $\alpha$ -ol              | <b>Epi-stigmastanol</b><br>C <sub>29</sub> H <sub>52</sub> O                                          |  | 40.5                              | 215; 383; 398                                   |
|                       | 24 $\alpha$ -Ethyl-5 $\alpha$ -cholestan-3 $\beta$ -ol             | <b><math>\alpha</math>-Stigmastanol</b><br>C <sub>29</sub> H <sub>52</sub> O                          |  | 44.1                              | 215; 383; 398                                   |

|                   |                                                              |                                                                                           |                                                                                      |      |               |
|-------------------|--------------------------------------------------------------|-------------------------------------------------------------------------------------------|--------------------------------------------------------------------------------------|------|---------------|
| <b>Stanones</b>   | 5 $\alpha$ -Pregnan-3-one                                    | <b>Pregnanolone</b> <sup>b,c</sup><br>C <sub>21</sub> H <sub>34</sub> O                   | 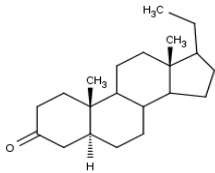   | 24.6 | 215; 300; 375 |
|                   | 5 $\alpha$ -Cholestan-3-one                                  | <b>Cholestanone</b><br>C <sub>27</sub> H <sub>46</sub> O                                  |    | 35.0 | 231; 386      |
|                   | 5 $\beta$ -Cholestan-3-one                                   | <b>Coprostanone</b><br>C <sub>27</sub> H <sub>46</sub> O                                  |    | 36.5 | 231; 386      |
|                   | 4-Cholesten-3-one                                            | <b>4-Cholesten-3-one</b><br>C <sub>27</sub> H <sub>44</sub> O                             |    | 39.3 | 229; 261; 384 |
|                   | 5 $\alpha$ -Cholestan-3 $\beta$ -ol-6-one                    | <b>6-Ketocholestanol</b><br>C <sub>27</sub> H <sub>46</sub> O <sub>2</sub>                |   | 46.6 | 445; 459; 474 |
| <b>Bile acids</b> | 7 $\alpha$ ,12 $\alpha$ -Dihydroxy-5 $\beta$ -cholanoic acid | Isodeoxycholic acid <sup>d</sup> (IDCA)<br>C <sub>24</sub> H <sub>40</sub> O <sub>4</sub> |  | 31.6 | 255; 355; 370 |
|                   | 3 $\beta$ -Hydroxy-5 $\beta$ -cholanoic acid                 | Isolithocholic acid (ILCA)<br>C <sub>24</sub> H <sub>40</sub> O <sub>3</sub>              |  | 34.1 | 215; 257; 372 |
|                   | 3 $\alpha$ -Hydroxy-5 $\beta$ -cholanoic acid                | Lithocholic acid (LCA)<br>C <sub>24</sub> H <sub>40</sub> O <sub>3</sub>                  |  | 34.4 | 215; 257; 372 |
|                   | 3 $\alpha$ ,12 $\alpha$ -Dihydroxy-5 $\beta$ -cholanoic acid | Deoxycholic acid (DCA)<br>C <sub>24</sub> H <sub>40</sub> O <sub>4</sub>                  |  | 36.5 | 255; 345; 370 |
|                   | 3 $\alpha$ ,7 $\alpha$ -Dihydroxy-5 $\beta$ -cholanoic acid  | Chenodeoxycholic acid (CDCA)<br>C <sub>24</sub> H <sub>40</sub> O <sub>4</sub>            |  | 37.2 | 255; 355; 370 |

|                                                              |                                                                                 |                                                                                    |                                       |               |
|--------------------------------------------------------------|---------------------------------------------------------------------------------|------------------------------------------------------------------------------------|---------------------------------------|---------------|
| 3 $\alpha$ , 6 $\alpha$ -Dihydroxy-5 $\beta$ -cholanoic acid | Hydoxychoholic acid (HDCA)<br>C <sub>24</sub> H <sub>40</sub> O <sub>4</sub>    | 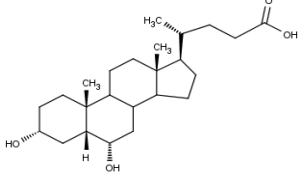 | 37.7                                  | 255; 355; 370 |
| 3 $\alpha$ , 7 $\beta$ -Dihydroxy-5 $\beta$ -cholanoic acid  | Ursodeoxychoholic acid (UDCA)<br>C <sub>24</sub> H <sub>40</sub> O <sub>4</sub> |  | 38.5                                  | 255; 355; 460 |
| <b><u>second internal standard (IS2)</u></b>                 | 5 $\alpha$ -Cholestane <sup>e</sup>                                             |  | 27.9 <sup>f</sup> ; 25.4 <sup>g</sup> | 271; 357; 372 |

<sup>a</sup> according to own measurements; <sup>b</sup> first internal standard for stanols and sterols; <sup>c</sup> first internal standard for stanones; <sup>d</sup> first internal standard for bile acids; <sup>e</sup> second internal standard; <sup>f</sup> measurement of stanols, stanones, and sterols; <sup>g</sup> measurement of bile acids.
