# Supplementary material for: Organic Fertilization and Sufficient Nutrient Status in Prehistoric Agriculture? – Indications from Multi-Proxy Analyses of Archaeological Topsoil Relicts
Source: PubMed Central journal article supplement (PMC4152168; doi:10.1371/journal.pone.0106244), 2014-09-02
Supplement: pone.0106244.s005.pdf [file pone.0106244.s005.pdf]

**Table S3: Bile acid contents (in  $\mu\text{g kg}^{-1}$  soil) (average and standard deviation in parentheses) in all investigated samples.**

| Region/<br>excavation site | sample type        | soil depth<br>[cm] | bile acids [ $\mu\text{g kg}^{-1}$ soil] |                     |                            |                          |                           | $\Sigma$ bile<br>acids |
|----------------------------|--------------------|--------------------|------------------------------------------|---------------------|----------------------------|--------------------------|---------------------------|------------------------|
|                            |                    |                    | Lithocholic<br>acid                      | Deoxycholic<br>acid | Chenodeox<br>y-cholic acid | Hyodeoxy-<br>cholic acid | Ursodeoxy-<br>cholic acid |                        |
| <b>Western Germany</b>     |                    |                    |                                          |                     |                            |                          |                           |                        |
| Luvisol region             |                    |                    |                                          |                     |                            |                          |                           |                        |
| Merzenich                  | pit filling 1      | 123                | 16.7                                     | 536.5               | 22.4                       | 134.0                    | 31.9                      | 741.5                  |
|                            | adjacent subsoil 1 | 123                | n.d.                                     | 43.4 (2.8)          | n.q.                       | 28.9                     | 18.1                      | 90.4                   |
|                            | pit filling 2      | 125                | n.q.                                     | 83.2 (38.6)         | n.q.                       | 59.7 (33.1)              | n.q.                      | 142.9                  |
|                            | adjacent subsoil 2 | 125                | n.q.                                     | 53.4 (51.7)         | n.q.                       | 33.8 (47.8)              | n.q.                      | 87.2                   |
|                            | pit filling 3      | 130                | n.d.                                     | 107.5 (0.9)         | n.q.                       | 170.4 (124.3)            | n.d.                      | 277.9                  |
|                            | adjacent subsoil 3 | 130                | n.q.                                     | n.q.                | n.q.                       | 31.8 (9.1)               | n.d.                      | 31.8                   |
|                            | pit filling 4      | 175                | n.q.                                     | 104.6 (12.7)        | n.q.                       | 79.2 (14.9)              | 13.4 (4.5)                | 197.2                  |
|                            | adjacent subsoil 4 | 175                | n.q.                                     | 161.4 (102)         | 20.4 (11.5)                | 84.8 (52.0)              | 56.3 (40.9)               | 322.9                  |
|                            | pit filling 5      | 180                | n.q.                                     | 76.1 (46.6)         | n.q.                       | 73.9 (53.9)              | n.q.                      | 149.9                  |
|                            | adjacent subsoil 5 | 180                | n.q.                                     | 21.6 (5.3)          | n.q.                       | 14.7 (4.6)               | n.q.                      | 36.3                   |
|                            | pit filling 6      | 263                | 16.8 (1.0)                               | 214.0 (58.0)        | n.q.                       | 175.7 (56.3)             | n.q.                      | 406.5                  |
|                            | adjacent subsoil 6 | 263                | n.q.                                     | n.q.                | n.q.                       | n.d.                     | n.q.                      | 0.0                    |
| Düren<br>Arnoldsweiler     | humic zone         | 170                | n.d.                                     | n.d.                | n.q.                       | n.d.                     | n.q.                      | 0.0                    |

n.q. not quantifiable (under quantification limit;  $5 \mu\text{g kg}^{-1}$  soil for deoxcholic acid and  $10 \mu\text{g kg}^{-1}$  soil for all other bile acids);

n.d. not detectable (under detection limit)
