# Supplementary material for: Organic Fertilization and Sufficient Nutrient Status in Prehistoric Agriculture? – Indications from Multi-Proxy Analyses of Archaeological Topsoil Relicts
Source: PubMed Central journal article supplement (PMC4152168; doi:10.1371/journal.pone.0106244), 2014-09-02
Supplement: pone.0106244.s006.pdf [file pone.0106244.s006.pdf]

**Table S4: BPCA analysis (in duplicate) of all soil samples (average  $\pm$  standard deviation; SD < 15% for BPCAs; n.d., not detectable) and L\* value.**

| Id | Site                | Sample type      | BPCA-C                    | $\Sigma$ B3CA-C           | $\Sigma$ B4CA-C           | $\Sigma$ B5CA-C           | $\Sigma$ B6CA-C           | Colour [L*] |  |
|----|---------------------|------------------|---------------------------|---------------------------|---------------------------|---------------------------|---------------------------|-------------|--|
|    |                     |                  | [g kg <sup>-1</sup> soil] | [g kg <sup>-1</sup> soil] | [g kg <sup>-1</sup> soil] | [g kg <sup>-1</sup> soil] | [g kg <sup>-1</sup> soil] |             |  |
| 1  | Kleingräfendorf     | pit filling      | 118.1 $\pm$ 4.9           | 3.8 $\pm$ 0.1             | 22.6 $\pm$ 1.0            | 40.6 $\pm$ 1.6            | 51.1 $\pm$ 2.1            | 50.0        |  |
| 2  | Kleingräfendorf     | adjacent subsoil | 46.5 $\pm$ 4.1            | 1.3 $\pm$ 0.1             | 20.4 $\pm$ 2.2            | 11.5 $\pm$ 0.8            | 13.3 $\pm$ 1.1            | 64.2        |  |
| 3  | Kleingräfendorf     | recent topsoil   | 60.9 $\pm$ 1.0            | 2.4 $\pm$ 0.1             | 12.6 $\pm$ 0.2            | 20.1 $\pm$ 0.2            | 25.8 $\pm$ 0.5            | 45.2        |  |
| 4  | Kleingräfendorf     | pit filling      | 124.6 $\pm$ 10.3          | 3.4 $\pm$ 0.2             | 22.7 $\pm$ 1.3            | 48.9 $\pm$ 3.8            | 49.7 $\pm$ 5.0            | 53.4        |  |
| 5  | Kleingräfendorf     | adjacent subsoil | 24.3 $\pm$ 1.2            | 0.8 $\pm$ 0.0             | 11.5 $\pm$ 0.3            | 5.8 $\pm$ 0.4             | 6.2 $\pm$ 0.5             | 63.0        |  |
| 6  | Jügendorf           | adjacent subsoil | 30.4 $\pm$ 2.5            | 1.2 $\pm$ 0.1             | 14.0 $\pm$ 1.2            | 6.6 $\pm$ 0.5             | 8.5 $\pm$ 0.7             | 64.5        |  |
| 7  | Jügendorf           | pit filling      | 110.3 $\pm$ 12.7          | 5.3 $\pm$ 0.8             | 22.9 $\pm$ 2.5            | 37.9 $\pm$ 4.9            | 44.1 $\pm$ 4.5            | 50.1        |  |
| 8  | Jügendorf           | recent topsoil   | 32.9 $\pm$ 3.5            | 1.6 $\pm$ 0.2             | 9.9 $\pm$ 0.5             | 11.2 $\pm$ 0.5            | 10.2 $\pm$ 4.7            | 53.5        |  |
| 9  | Jügendorf           | pit filling      | 68.9 $\pm$ 0.2            | 2.4 $\pm$ 0.0             | 15.6 $\pm$ 0.1            | 23.3 $\pm$ 0.1            | 27.6 $\pm$ 0.1            | 56.8        |  |
| 10 | Jügendorf           | adjacent subsoil | 104.7 $\pm$ 0.9           | 3.9 $\pm$ 0.0             | 22.1 $\pm$ 0.2            | 36.2 $\pm$ 0.4            | 42.5 $\pm$ 0.3            | 48.5        |  |
| 11 | Jügendorf           | recent topsoil   | 77.3 $\pm$ 0.1            | 3.0 $\pm$ 0.1             | 15.7 $\pm$ 0.1            | 26.2 $\pm$ 0.0            | 32.4 $\pm$ 0.1            | 48.8        |  |
| 12 | Jügendorf           | pit filling      | 114.9 $\pm$ 10.9          | 4.0 $\pm$ 1.2             | 22.6 $\pm$ 0.1            | 42.5 $\pm$ 8.1            | 45.7 $\pm$ 3.8            | 46.4        |  |
| 13 | Jügendorf           | adjacent subsoil | n.d.                      | n.d.                      | n.d.                      | n.d.                      | n.d.                      | 63.5        |  |
| 14 | Jügendorf           | recent topsoil   | 77.0 $\pm$ 3.9            | 2.2 $\pm$ 0.1             | 14.9 $\pm$ 0.4            | 29.9 $\pm$ 1.4            | 30.0 $\pm$ 2.0            | 46.8        |  |
| 15 | Oechlitz            | settlement pit   | 68.6 $\pm$ 3.5            | 2.7 $\pm$ 0.1             | 13.8 $\pm$ 0.6            | 23.5 $\pm$ 1.3            | 28.6 $\pm$ 1.5            | 53.1        |  |
| 16 | Oechlitz            | pit filling      | 109.9 $\pm$ 1.7           | 3.3 $\pm$ 0.2             | 22.2 $\pm$ 1.1            | 44.3 $\pm$ 0.8            | 40.1 $\pm$ 0.4            | 52.9        |  |
| 17 | Oechlitz            | adjacent subsoil | 29.7 $\pm$ 1.4            | 2.2 $\pm$ 0.2             | 13.6 $\pm$ 0.1            | 7.6 $\pm$ 0.7             | 6.3 $\pm$ 0.4             | 61.9        |  |
| 18 | Oechlitz            | recent topsoil   | 111.2 $\pm$ 2.0           | 3.9 $\pm$ 0.0             | 22.4 $\pm$ 0.0            | 38.6 $\pm$ 0.8            | 46.3 $\pm$ 1.2            | 46.4        |  |
| 19 | Prießnitz           | recent topsoil   | 33.9 $\pm$ 1.3            | 1.2 $\pm$ 0.1             | 8.4 $\pm$ 0.2             | 11.2 $\pm$ 0.6            | 13.2 $\pm$ 0.5            | 57.6        |  |
| 20 | Prießnitz           | pit filling      | 100.5 $\pm$ 23.2          | 4.9 $\pm$ 0.1             | 26.5 $\pm$ 0.1            | 36.9 $\pm$ 2.1            | 32.3 $\pm$ 21.1           | 55.2        |  |
| 21 | Prießnitz           | adjacent subsoil | 55.9 $\pm$ 0.0            | 2.8 $\pm$ 0.0             | 19.7 $\pm$ 0.0            | 21.3 $\pm$ 0.0            | 12.1 $\pm$ 0.0            | 64.4        |  |
| 22 | Prießnitz           | pit filling      | 138.4 $\pm$ 12.0          | 5.9 $\pm$ 0.7             | 30.5 $\pm$ 3.1            | 48.0 $\pm$ 6.7            | 54.1 $\pm$ 1.5            | 50.4        |  |
| 23 | Prießnitz           | adjacent subsoil | 10.2 $\pm$ 0.2            | 0.6 $\pm$ 0.0             | 5.0 $\pm$ 0.1             | 2.2 $\pm$ 0.0             | 2.5 $\pm$ 0.1             | 63.8        |  |
| 24 | Merzenich           | recent topsoil   | 37.5 $\pm$ 0.2            | 1.2 $\pm$ 0.0             | 7.4 $\pm$ 0.0             | 13.4 $\pm$ 0.1            | 15.5 $\pm$ 0.1            | 54.1        |  |
| 25 | Merzenich           | adjacent subsoil | 25.8 $\pm$ 2.6            | 1.3 $\pm$ 0.4             | 12.4 $\pm$ 1.9            | 6.0 $\pm$ 0.2             | 6.1 $\pm$ 0.2             | 61.2        |  |
| 26 | Merzenich           | pit filling      | 182.3 $\pm$ 0.7           | 7.3 $\pm$ 0.0             | 42.7 $\pm$ 0.1            | 69.1 $\pm$ 0.3            | 63.2 $\pm$ 0.3            | 51.1        |  |
| 27 | Merzenich           | pit filling      | 153.8 $\pm$ 16.6          | 7.3 $\pm$ 1.1             | 51.4 $\pm$ 6.4            | 46.0 $\pm$ 4.8            | 49.2 $\pm$ 4.3            | 56.6        |  |
| 28 | Merzenich           | pit filling      | 148.0 $\pm$ 57.9          | 11.1 $\pm$ 0.8            | 44.5 $\pm$ 4.0            | 53.7 $\pm$ 16.4           | 38.7 $\pm$ 36.6           | 53.3        |  |
| 29 | Merzenich           | pit filling      | 141.3 $\pm$ 3.4           | 7.0 $\pm$ 0.2             | 33.5 $\pm$ 0.9            | 49.0 $\pm$ 1.2            | 51.8 $\pm$ 1.2            | 52.0        |  |
| 30 | Merzenich           | pit filling      | 127.4 $\pm$ 5.6           | 5.8 $\pm$ 0.3             | 28.7 $\pm$ 1.0            | 43.3 $\pm$ 2.2            | 49.7 $\pm$ 2.1            | 51.7        |  |
| 31 | Merzenich           | adjacent subsoil | 10.1 $\pm$ 0.1            | 0.2 $\pm$ 0.3             | 4.8 $\pm$ 0.1             | 2.5 $\pm$ 0.0             | 2.6 $\pm$ 0.1             | 58.2        |  |
| 32 | Merzenich           | adjacent subsoil | n.d.                      | n.d.                      | n.d.                      | n.d.                      | n.d.                      | 56.9        |  |
| 33 | Merzenich           | adjacent subsoil | n.d.                      | n.d.                      | n.d.                      | n.d.                      | n.d.                      | 57.0        |  |
| 34 | Merzenich           | adjacent subsoil | 96.5 $\pm$ 1.5            | 3.0 $\pm$ 0.1             | 31.5 $\pm$ 1.1            | 32.9 $\pm$ 0.8            | 29.1 $\pm$ 0.5            | 56.8        |  |
| 35 | Merzenich           | adjacent subsoil | 88.9 $\pm$ 0.7            | 2.7 $\pm$ 0.2             | 25.0 $\pm$ 2.2            | 32.3 $\pm$ 0.5            | 28.9 $\pm$ 2.3            | 56.4        |  |
| 36 | Merzenich           | pit filling      | 222.1 $\pm$ 8.8           | 10.2 $\pm$ 0.2            | 51.4 $\pm$ 1.9            | 89.4 $\pm$ 3.3            | 71.2 $\pm$ 3.5            | 54.1        |  |
| 37 | Merzenich           | pit filling      | 191.3 $\pm$ 13.4          | 6.5 $\pm$ 0.2             | 39.7 $\pm$ 2.2            | 74.3 $\pm$ 5.4            | 70.8 $\pm$ 5.6            | 53.6        |  |
| 38 | Merzenich           | adjacent subsoil | n.d.                      | n.d.                      | n.d.                      | n.d.                      | n.d.                      | 54.1        |  |
| 39 | Merzenich           | pit filling      | 224.4 $\pm$ 10.9          | 9.8 $\pm$ 0.8             | 50.6 $\pm$ 3.3            | 89.9 $\pm$ 5.1            | 74.2 $\pm$ 1.7            | 53.2        |  |
| 40 | Merzenich           | adjacent subsoil | n.d.                      | n.d.                      | n.d.                      | n.d.                      | n.d.                      | 57.1        |  |
| 41 | Merzenich           | adjacent subsoil | n.d.                      | n.d.                      | n.d.                      | n.d.                      | n.d.                      | 47.0        |  |
| 42 | Merzenich           | pit filling      | 44.7 $\pm$ 4.3            | 1.7 $\pm$ 0.1             | 21.8 $\pm$ 2.3            | 9.7 $\pm$ 0.8             | 11.5 $\pm$ 1.0            | 57.9        |  |
| 43 | Merzenich           | pit filling      | 64.3 $\pm$ 0.4            | 2.4 $\pm$ 0.2             | 24.2 $\pm$ 0.5            | 17.6 $\pm$ 0.4            | 20.1 $\pm$ 0.3            | 56.4        |  |
| 44 | Merzenich           | adjacent subsoil | 7.5 $\pm$ 0.3             | 0.2 $\pm$ 0.0             | 3.2 $\pm$ 0.2             | 1.8 $\pm$ 0.1             | 2.2 $\pm$ 0.1             | 61.1        |  |
| 45 | Pulheim             | recent topsoil   | 53.9 $\pm$ 0.3            | 2.1 $\pm$ 0.4             | 11.6 $\pm$ 0.1            | 15.2 $\pm$ 0.1            | 24.9 $\pm$ 0.3            | 56.4        |  |
| 46 | Pulheim             | adjacent subsoil | 95.6 $\pm$ 0.8            | 2.8 $\pm$ 0.1             | 24.6 $\pm$ 0.6            | 37.2 $\pm$ 1.3            | 31.0 $\pm$ 2.7            | 57.0        |  |
| 47 | Pulheim             | pit filling      | 126.0 $\pm$ 3.0           | 4.8 $\pm$ 0.2             | 42.5 $\pm$ 3.2            | 35.3 $\pm$ 0.3            | 43.3 $\pm$ 0.1            | 56.9        |  |
| 48 | Pulheim             | adjacent subsoil | 101.9 $\pm$ 0.2           | 2.8 $\pm$ 0.1             | 26.5 $\pm$ 0.2            | 37.5 $\pm$ 0.2            | 35.1 $\pm$ 0.4            | 56.8        |  |
| 49 | Pulheim             | pit filling      | 143.2 $\pm$ 8.7           | 5.2 $\pm$ 0.2             | 30.6 $\pm$ 0.5            | 57.2 $\pm$ 2.2            | 50.2 $\pm$ 7.2            | 52.4        |  |
| 50 | Düren Arnoldsweiler | below humic zone | n.d.                      | n.d.                      | n.d.                      | n.d.                      | n.d.                      | 68.9        |  |
| 51 | Düren Arnoldsweiler | humic zone       | 100.1 $\pm$ 4.1           | 3.7 $\pm$ 0.1             | 37.0 $\pm$ 1.0            | 29.0 $\pm$ 1.0            | 30.4 $\pm$ 2.0            | 62.2        |  |
